# Supplementary material for: Zoledronic acid alters hematopoiesis and generates breast tumor-suppressive bone marrow cells
Source: PubMed Central journal article supplement (PMC5339994; doi:10.1186/s13058-017-0815-8), 2017-03-06
Supplement: 13058_2017_815_MOESM4_ESM.pdf [file 13058_2017_815_MOESM4_ESM.pdf]

## a Osteoblast and osteoclast quantification

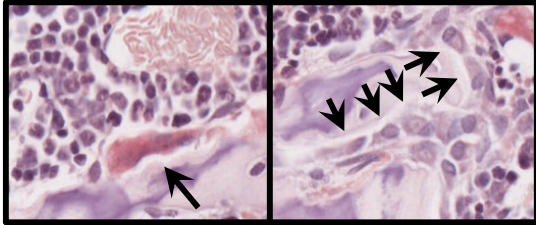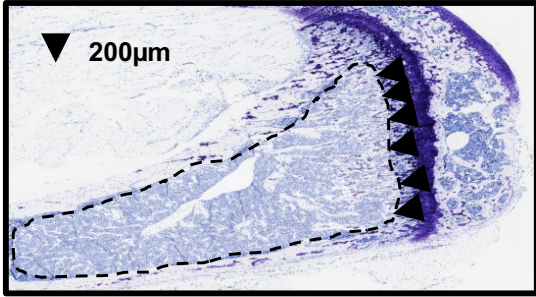

| Osteoclast                   | Osteoblast                                     |
|------------------------------|------------------------------------------------|
| Multiple nuclei              | Single, distinct nucleus                       |
| Ruffled border               | Large golgi complex                            |
| In contact with bone surface | Appear in groups, in contact with bone surface |
| Pink, TRAP positive          | Cuboidal shape                                 |

## b Quantification of proteoglycan-rich matrix

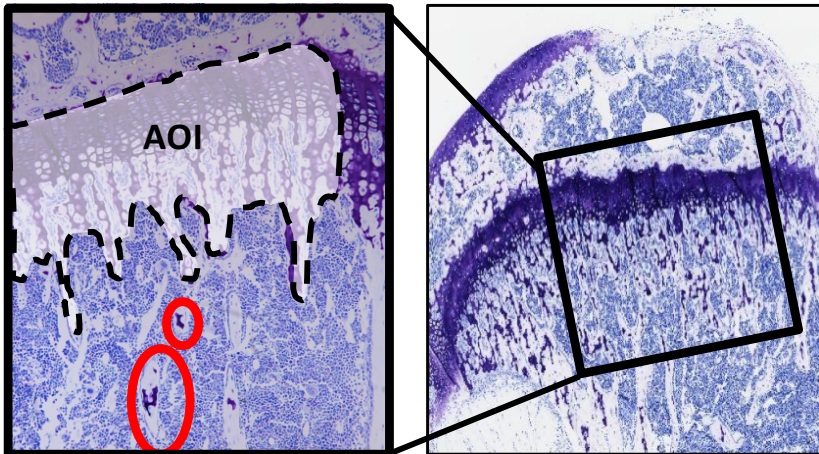

-  Excluded from analysis, not connected to trabecular bone surfaces extending from the epiphysis
-  Area of 1mmx1mm
-  Extracellular matrix rich area in metaphysis → Area of Interest (AOI)
