# Supplementary material for: Zoledronic acid alters hematopoiesis and generates breast tumor-suppressive bone marrow cells
Source: PubMed Central journal article supplement (PMC5339994; doi:10.1186/s13058-017-0815-8), 2017-03-06

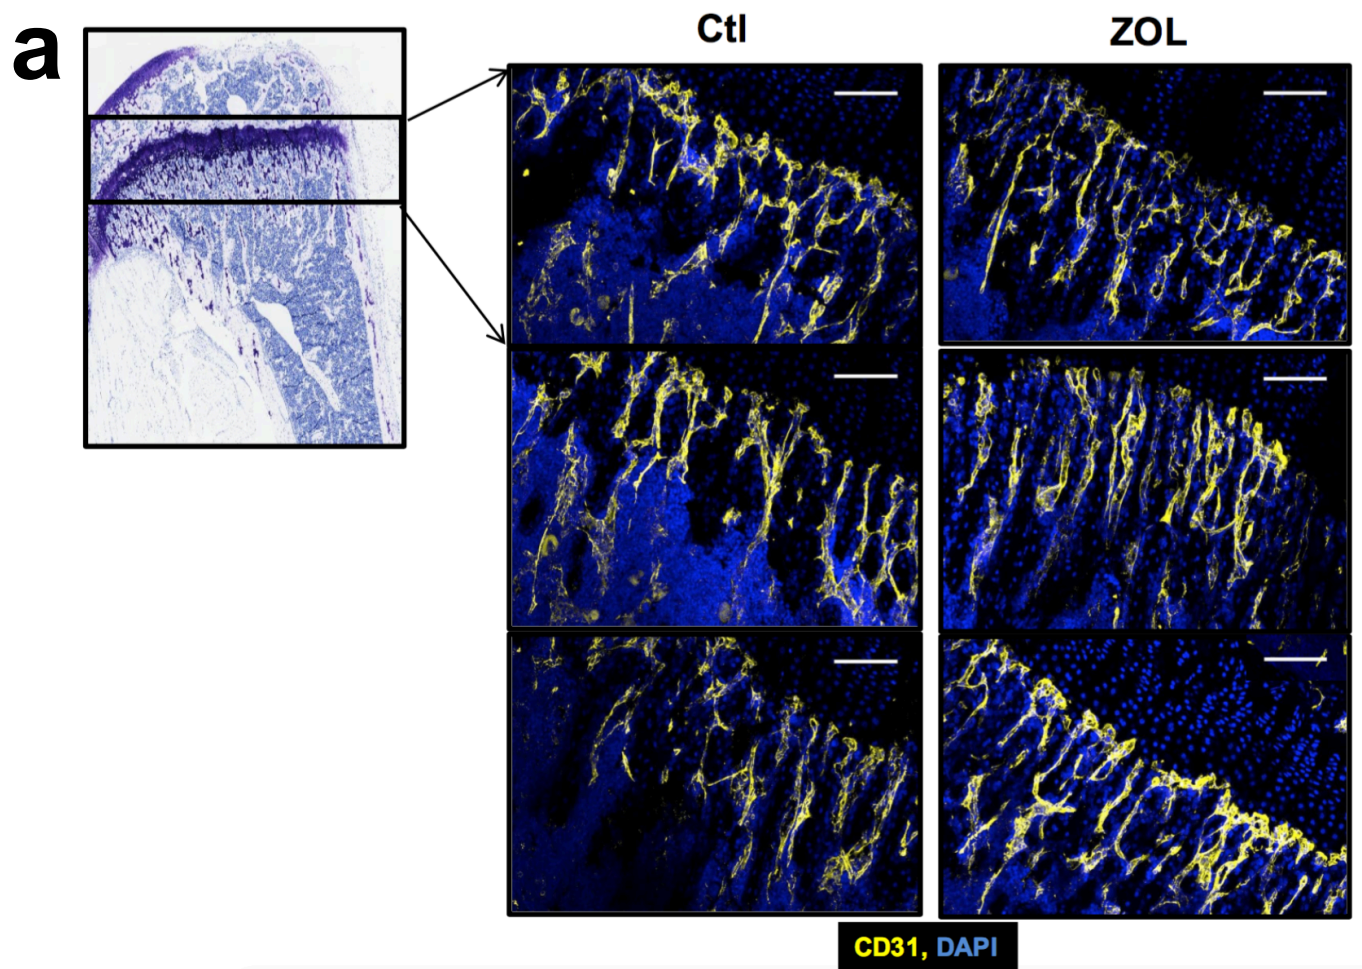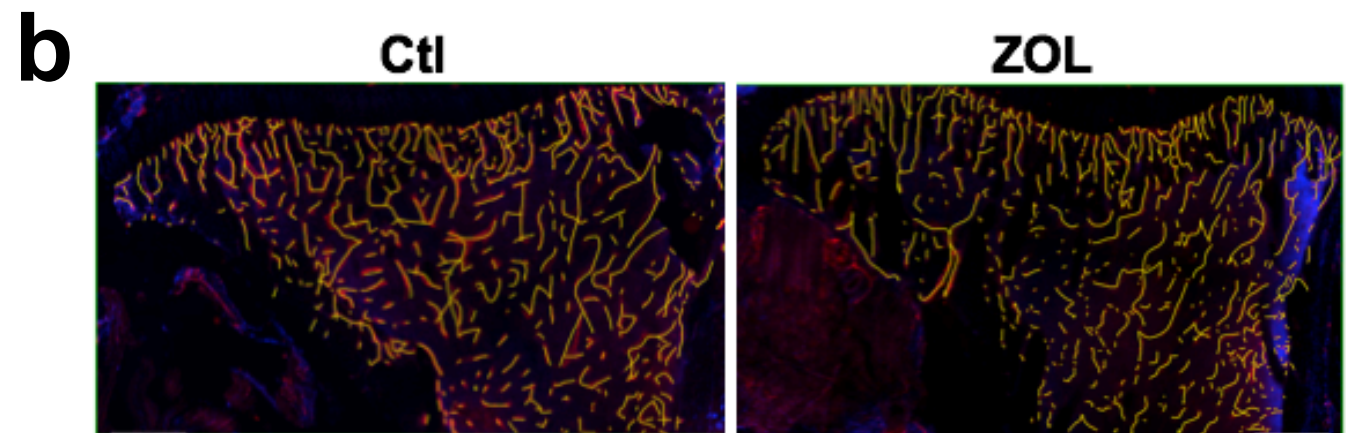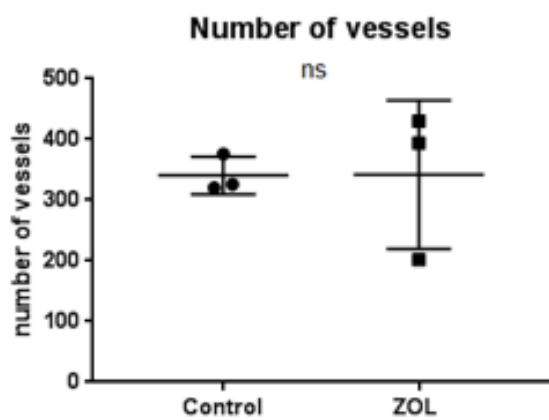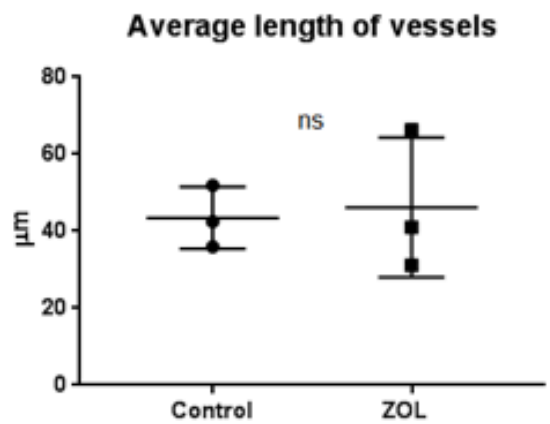

Supplement: 13058_2017_815_MOESM6_ESM.pdf [file 13058_2017_815_MOESM6_ESM.pdf]
