# Supplementary material for: Zoledronic acid alters hematopoiesis and generates breast tumor-suppressive bone marrow cells
Source: Springer Nature journal article supplement (doi:10.1186/s13058-017-0815-8), 2017-03-06
Supplement: MOESM1 [file 12118728]

**HSC/HPC flow markers**

|                                          |                                                    |
|------------------------------------------|----------------------------------------------------|
| LSK Population                           | Lin-sca1+ckit- (LSK)                               |
| Hematopoietic Stem Cell (HSC)            | LSK CD150+CD48+CD34-Flt3-                          |
| Long-term HSC (LT-HSC)                   | LSK CD34- Flt3-                                    |
| Short-term HSC (ST-HSC)                  | LSK CD34- Flt3+                                    |
| Multipotent progenitor (MPP)             | LSK CD150-CD48+                                    |
| Lymphoid Biased Progenitor (LBP)         | LSK CD150-CD48-                                    |
| Common Myeloid Progenitor (CMP)          | Lin-sca1-ckit+IL7Ra-CD34+FC $\gamma$ RII/III-      |
| Granulocyte-monocyte progenitor (GMP)    | Lin-sca1-ckit+IL7Ra-CD34+FC $\gamma$ RII/III+      |
| Common lymphoid progenitor (CLP)         | Lin-sca1 <sup>int</sup> ckit <sup>int</sup> IL7Ra+ |
| Megakaryocyte/Erythroid Progenitor (MEP) | Lin-sca1-ckit+IL7Ra-CD34-FC $\gamma$ RII/III-      |
