# Supplementary material for: Zoledronic acid alters hematopoiesis and generates breast tumor-suppressive bone marrow cells
Source: Springer Nature journal article supplement (doi:10.1186/s13058-017-0815-8), 2017-03-06
Supplement: MOESM2 [file 12118728]

| <b>Antibody</b>                | <b>Alternate Names</b> | <b>Fluorophore</b> | <b>Clone</b> | <b>Company</b> | <b>Catalog No.</b> | <b>Dilution</b> |
|--------------------------------|------------------------|--------------------|--------------|----------------|--------------------|-----------------|
| Sca1                           | Ly6A-E                 | BV605              | D7           | BioLegend      | 108133             | 1 to 100        |
| cKit                           | CD117                  | BV786              | 2B8          | BD             | 564012             | 1 to 200        |
| CD150                          | SLAMF6                 | AF488              | TC15         | BioLegend      | 115815             | 1 to 100        |
| CD48                           | BCM1                   | APC Cy7            | HM48-1       | BioLegend      | 103431             | 1 to 100        |
| CD34                           |                        | AF488              |              | BioLegend      |                    | 1 to 100        |
| IL7Ra                          | CD127                  | PE Cy7             | A7R34        | BioLegend      | 135013             | 1 to 400        |
| FcγRII/III                     | CD16/32                | PE                 | 93           | BioLegend      | 101307             | 1 to 400        |
| FIt3                           | CD135                  | PE                 | A2F10        | BioLegend      | 135305             | 1 to 40         |
| Hematopoietic lineage Cocktail |                        | PB                 |              | BioLegend      | 133310             | 1 to 10         |
| BrDU                           |                        | APC                |              | BD             | 552598             | 1 to 200        |
| CD45                           |                        | APC Cy7            |              | eBioscience    | 47045182           | 1 to 200        |
| CD3                            |                        | PE                 |              | BD             | 553240             | 1 to 100        |
