# Supplementary material for: Zoledronic acid alters hematopoiesis and generates breast tumor-suppressive bone marrow cells
Source: Springer Nature journal article supplement (doi:10.1186/s13058-017-0815-8), 2017-03-06

# Lymphocytes

# Single Cells

# Live/Dead

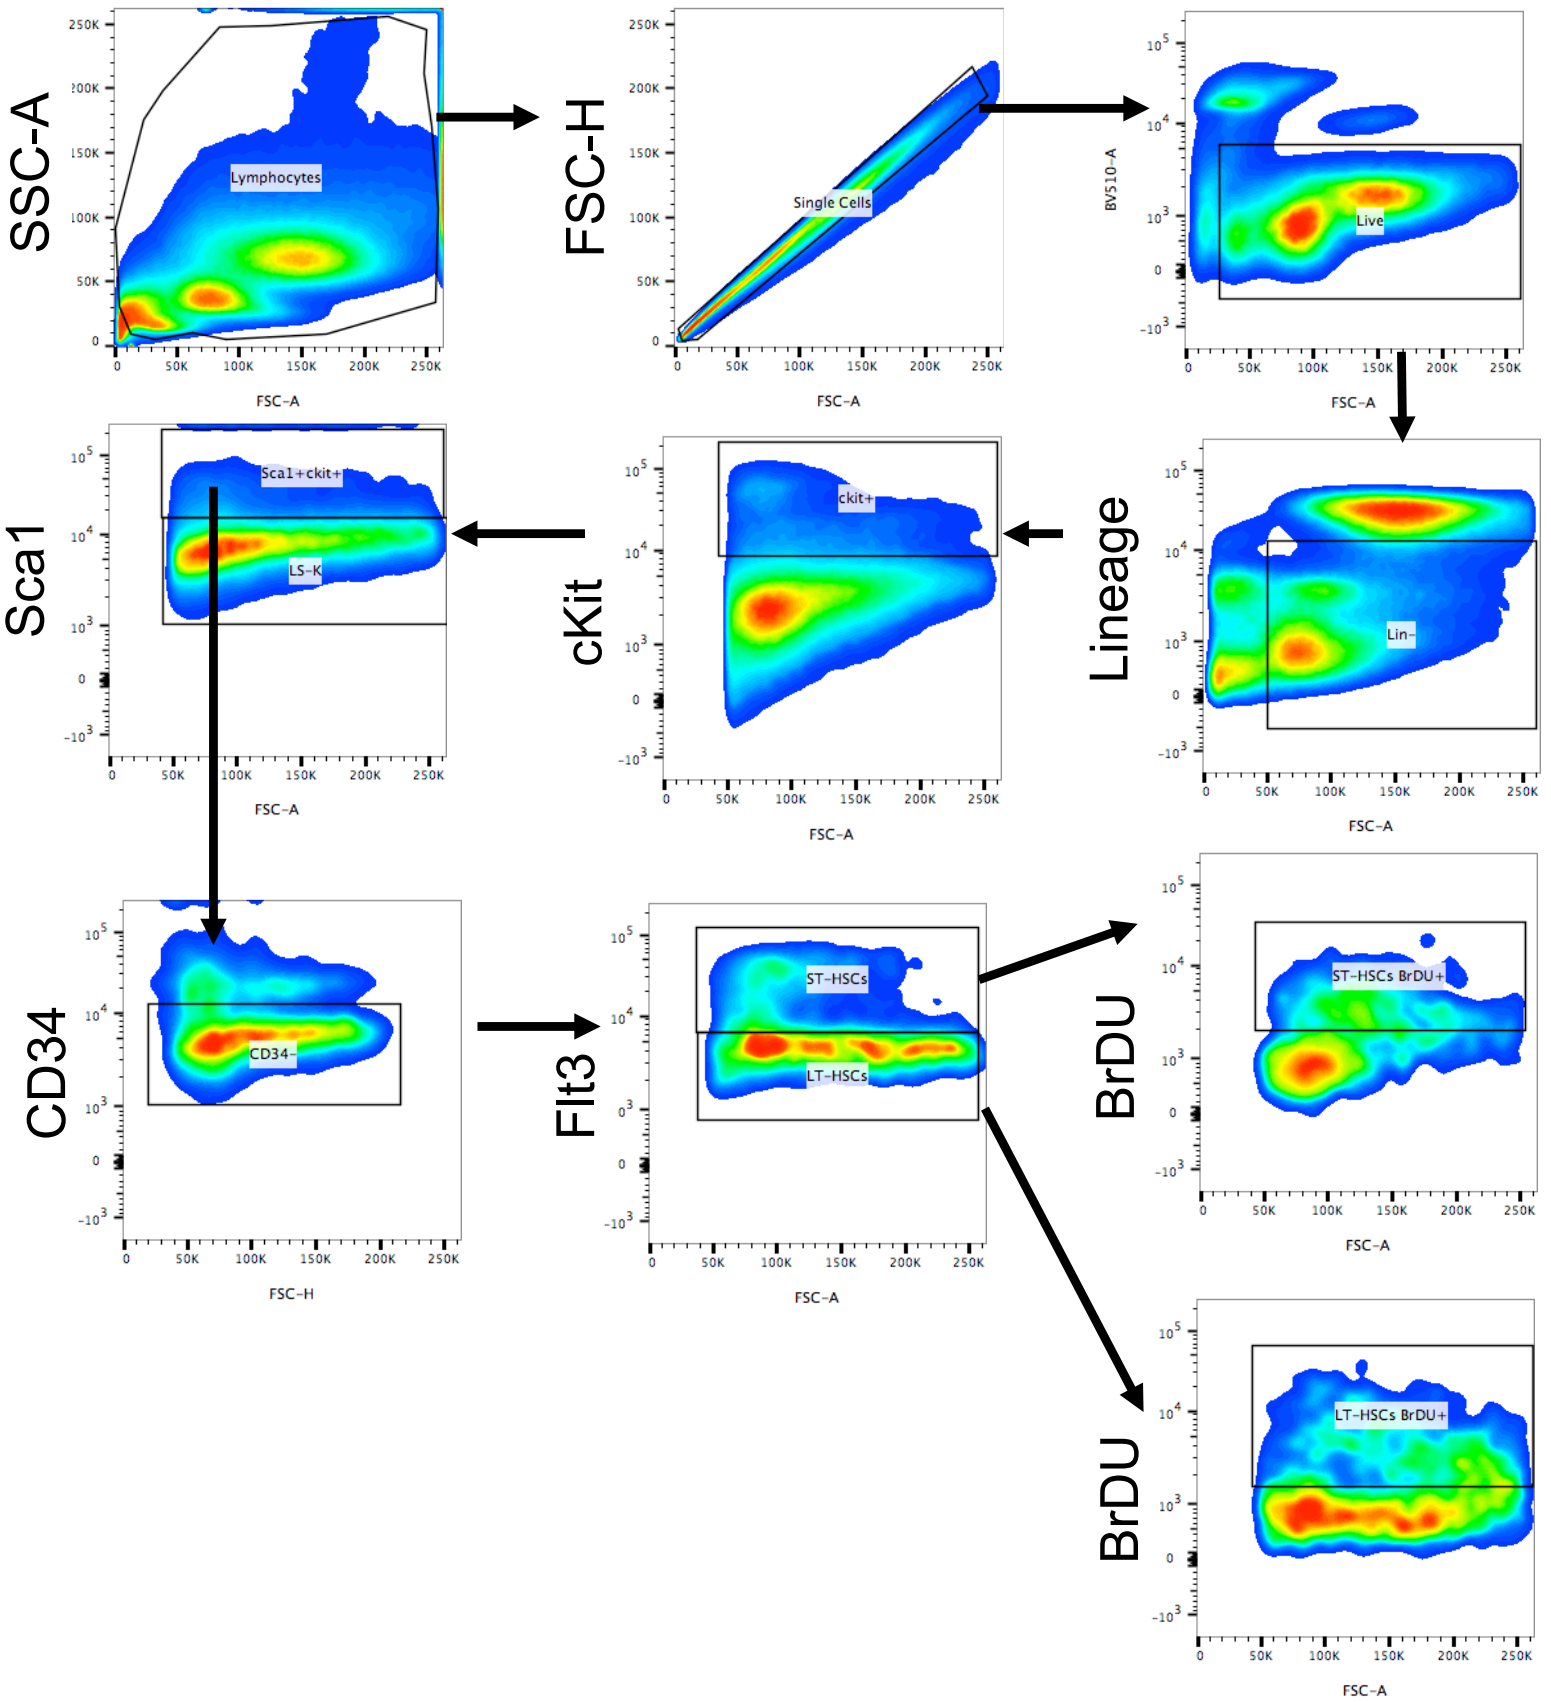

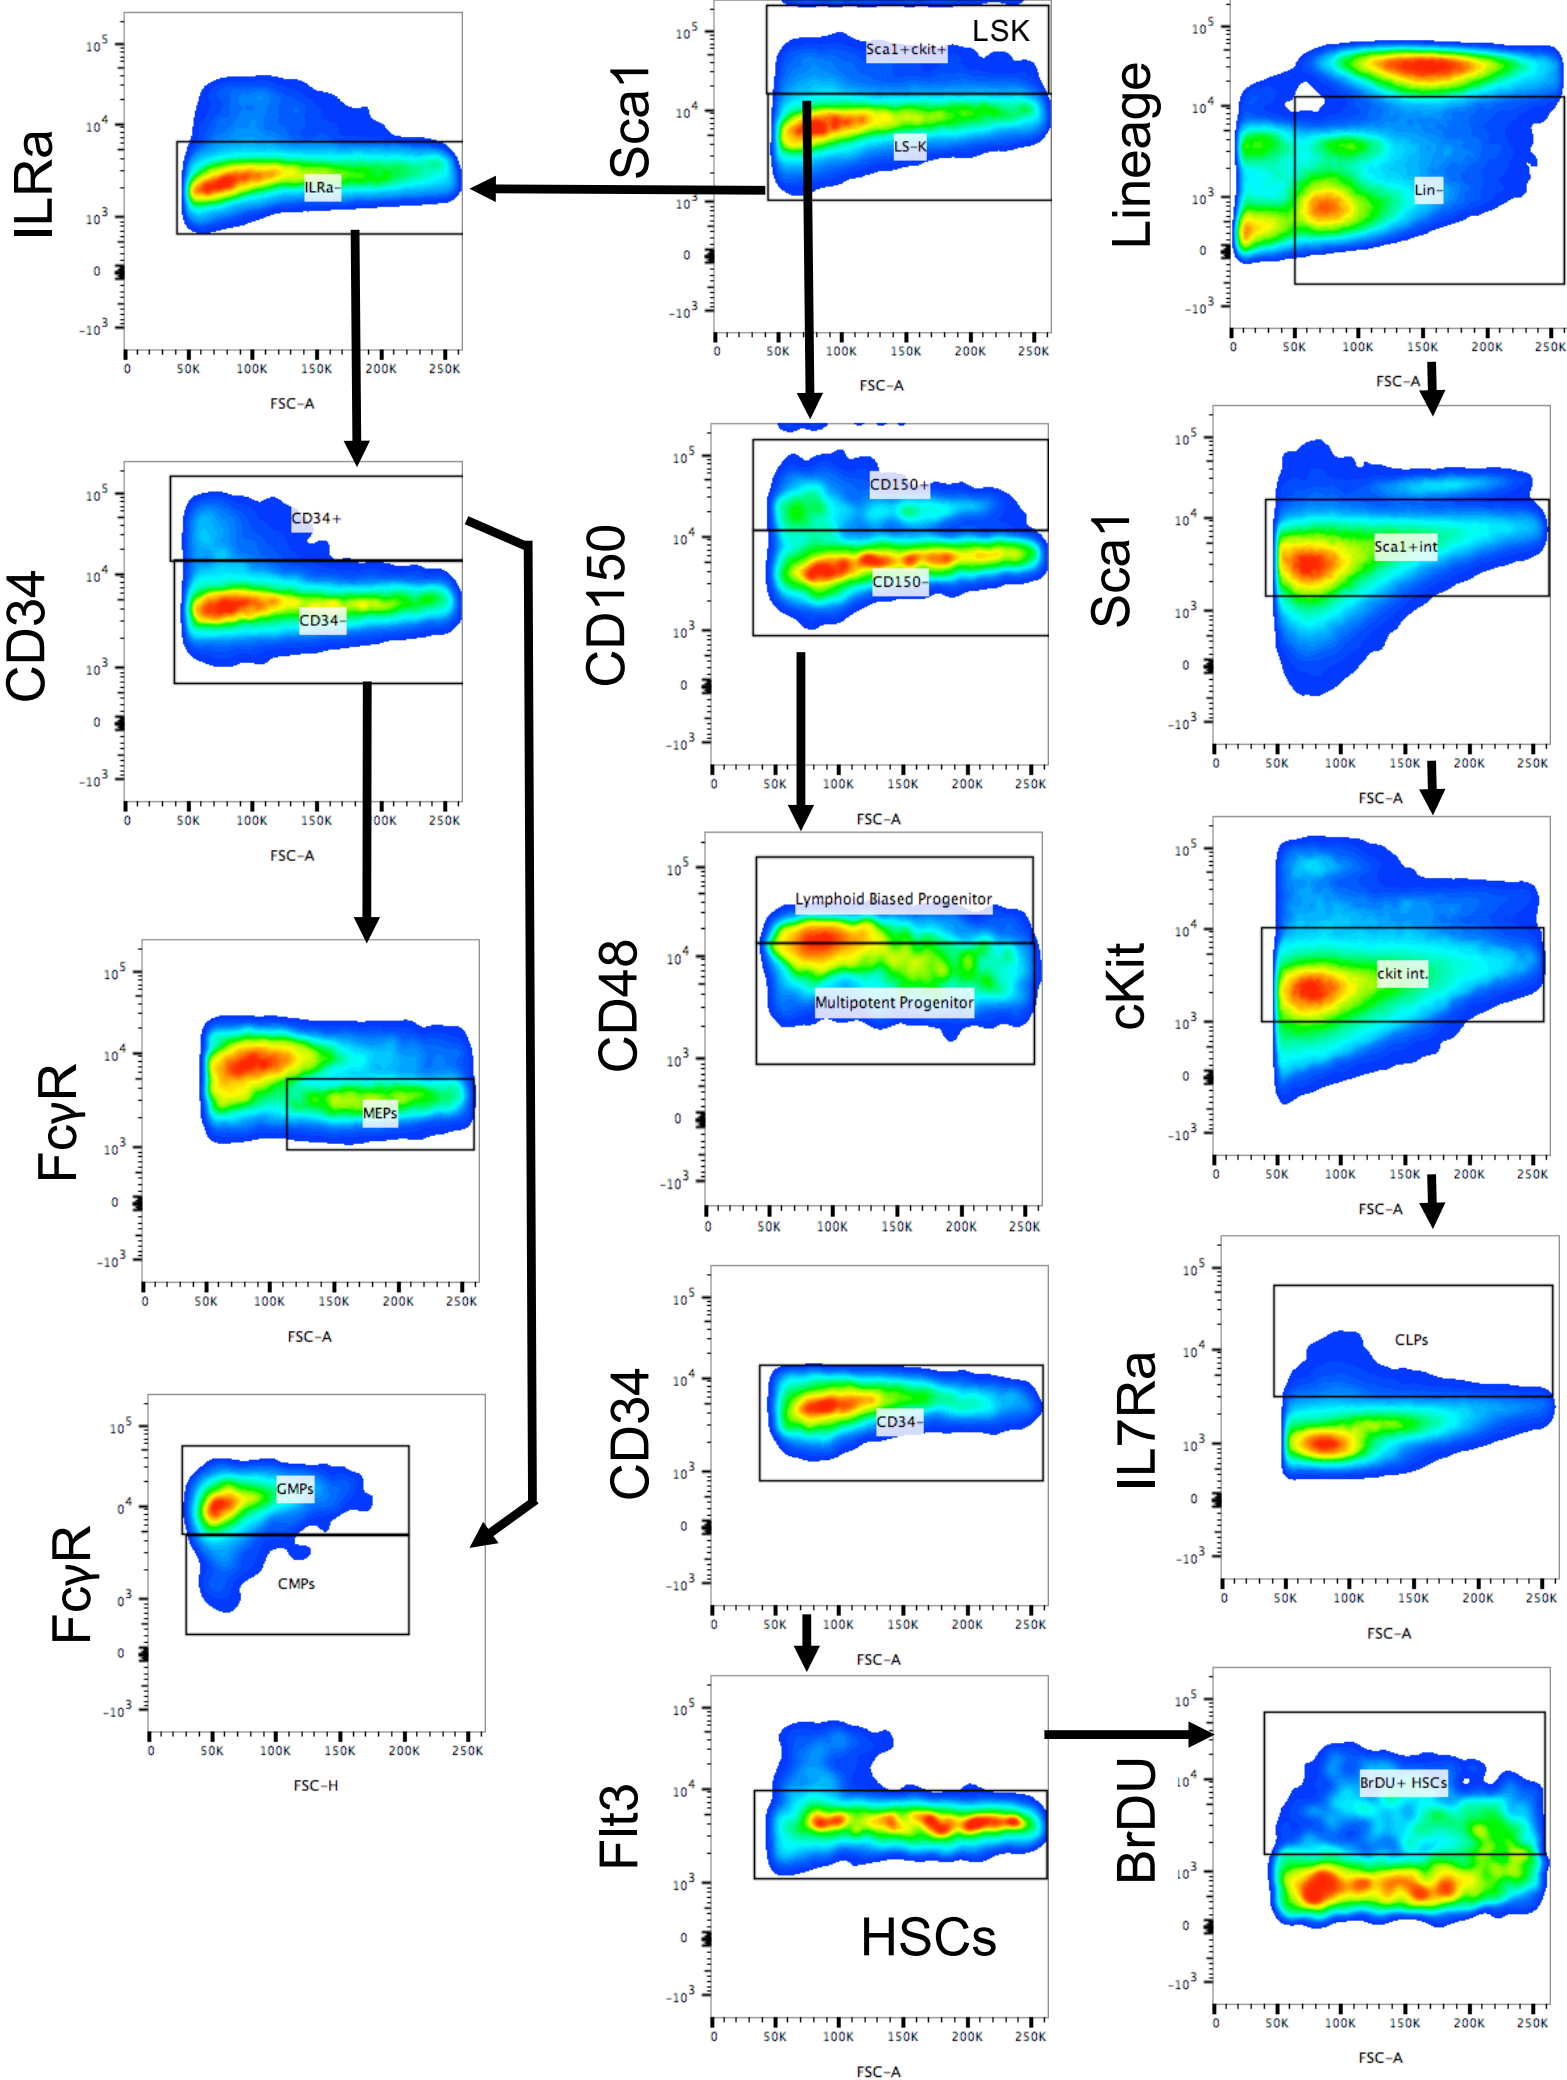

Supplement: MOESM3 [file 12118728]
