# Supplementary material for: Zoledronic acid alters hematopoiesis and generates breast tumor-suppressive bone marrow cells
Source: Springer Nature journal article supplement (doi:10.1186/s13058-017-0815-8), 2017-03-06

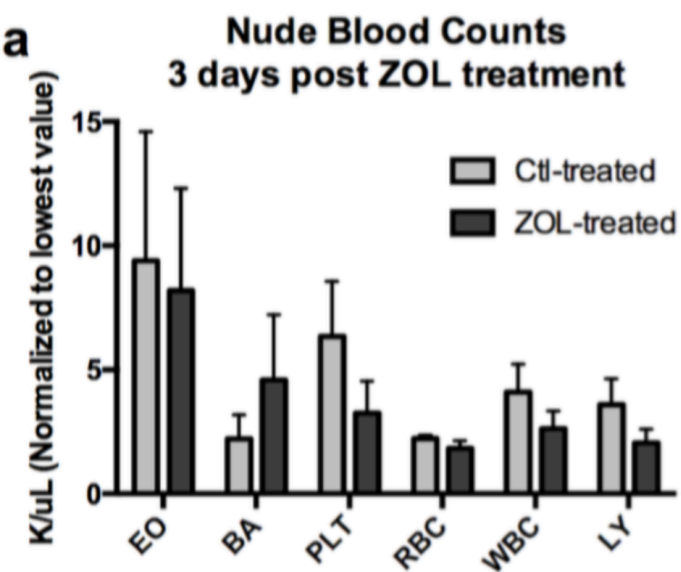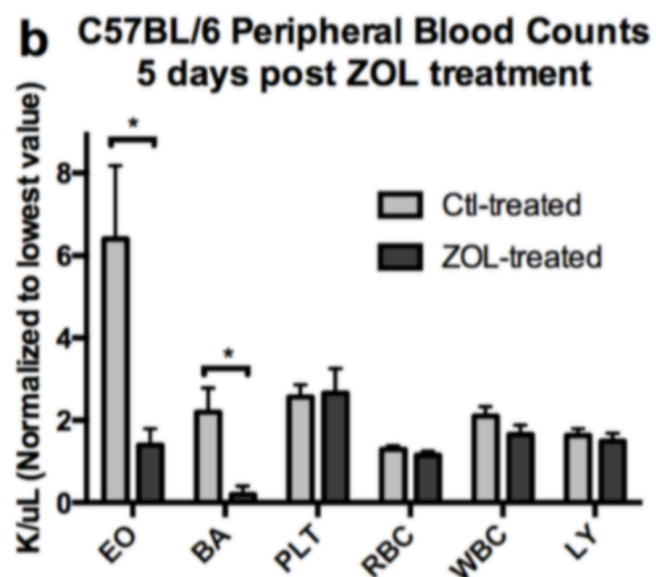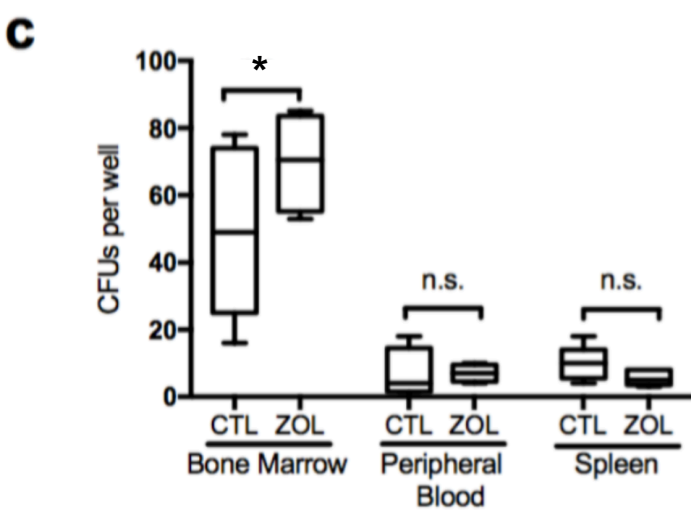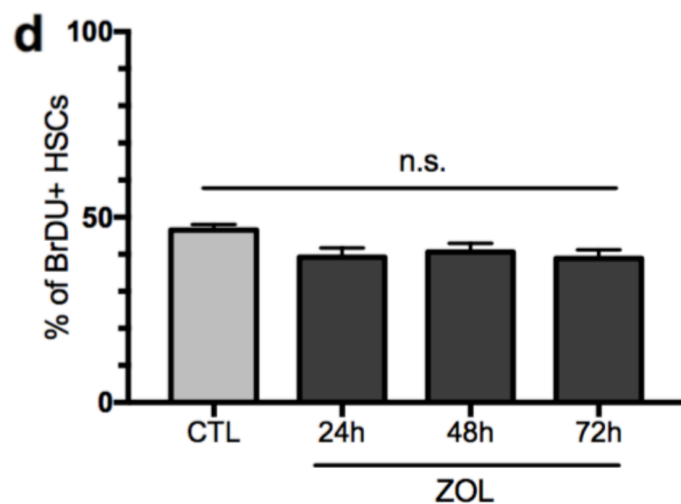

Supplement: MOESM5 [file 12118728]
